# Supplementary material for: An Improved Representation of Aerosol Mixing State for Air-Quality-Weather Interactions
Source: Copernicus journal article supplement (doi:10.5194/egusphere-2022-265), 2022-07-25
Supplement: Supplementary file 1 [file egusphere-2022-265-supplement.pdf]

# Supplemental figures for "An Improved Representation of Aerosol Mixing State for Air-Quality-Weather Interactions"

Robin Stevens<sup>1,2</sup>, Andrei Ryjkov<sup>1</sup>, Mahtab Majdzadeh<sup>3</sup>, and Ashu Dastoor<sup>1</sup>

<sup>1</sup>Air Quality Research Division, Environment and Climate Change Canada, 2121 Trans-Canada Highway, Dorval, Québec, Canada

<sup>2</sup>Université de Montreal, Montréal, Quebec, Canada

<sup>3</sup>Air Quality Research Division, Environment and Climate Change Canada, 4905 Dufferin Street, Toronto, Ontario, Canada

**Correspondence:** Ashu Dastoor (Ashu.Dastoor@ec.gc.ca)

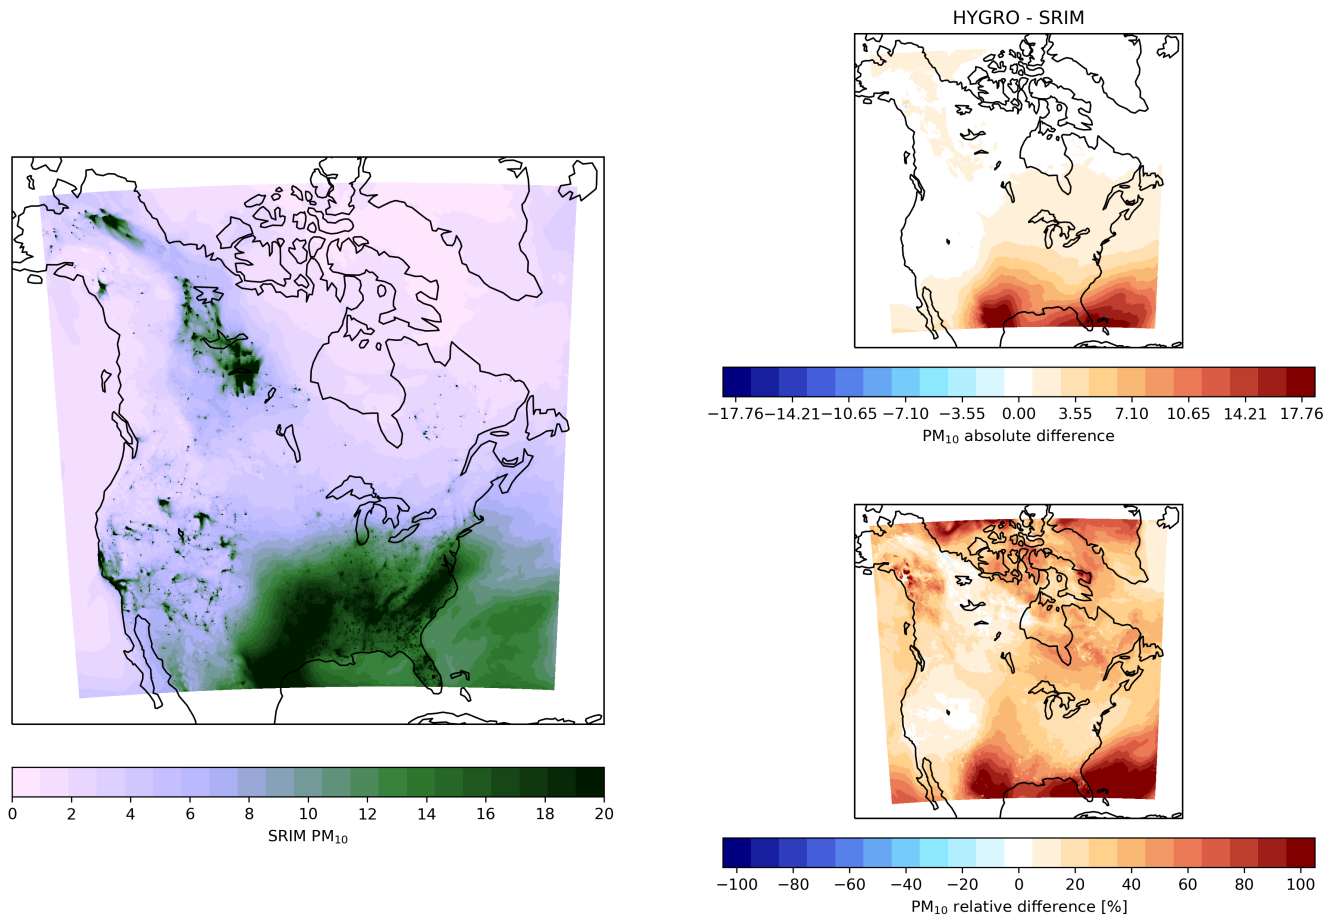

**Figure S1.** left: mean  $PM_{10}$  concentrations from the SRIM simulation; top right: mean difference in  $PM_{10}$  concentrations between the HYGRO and SRIM simulations; bottom right: relative difference in mean  $PM_{10}$  concentrations between the HYGRO and SRIM simulations. Note that  $PM_{10}$  concentrations are nearly identical in the HYGRO and 1L2B simulations.

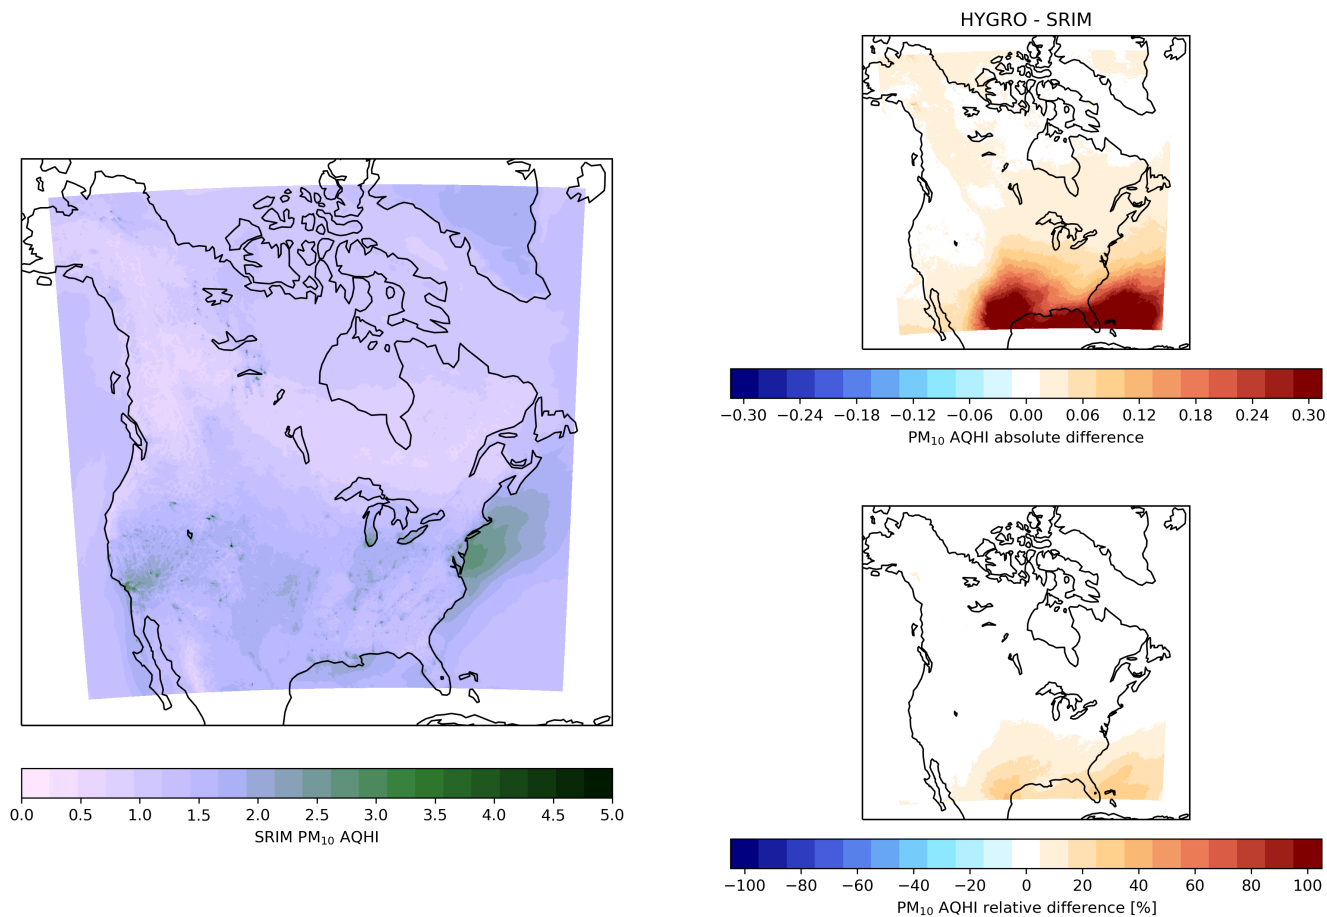

**Figure S2.** left: mean PM<sub>10</sub> AQHI values from the SRIM simulation; top right: mean difference in PM<sub>10</sub> AQHI values between the HYGRO and SRIM simulations; bottom right: relative difference in mean PM<sub>10</sub> AQHI values between the HYGRO and SRIM simulations. Note that PM<sub>10</sub> AQHI values are nearly identical in the HYGRO and 1L2B simulations.
